# Supplementary material
Source: publisher figshare collection journal article supplement (https://acs.figshare.com/ndownloader/files/5072416)
Supplement: Supplementary file 1 [file 5072416]

 
data_akbcs
 
_audit_creation_method            SHELXL-97
_chemical_name_systematic
;
 ?
;
_chemical_name_common             ?
_chemical_melting_point           ?
_chemical_formula_moiety          ?
_chemical_formula_sum
 'C36 H64 F4 Ni2 P4'
_chemical_formula_weight          814.17
 
loop_
 _atom_type_symbol
 _atom_type_description
 _atom_type_scat_dispersion_real
 _atom_type_scat_dispersion_imag
 _atom_type_scat_source
 'C'  'C'   0.0033   0.0016
 'International Tables Vol C Tables 4.2.6.8 and 6.1.1.4'
 'H'  'H'   0.0000   0.0000
 'International Tables Vol C Tables 4.2.6.8 and 6.1.1.4'
 'F'  'F'   0.0171   0.0103
 'International Tables Vol C Tables 4.2.6.8 and 6.1.1.4'
 'P'  'P'   0.1023   0.0942
 'International Tables Vol C Tables 4.2.6.8 and 6.1.1.4'
 'Ni'  'Ni'   0.3393   1.1124
 'International Tables Vol C Tables 4.2.6.8 and 6.1.1.4'
 
_symmetry_cell_setting            ?
_symmetry_space_group_name_H-M     'P 21/n'
 
loop_
 _symmetry_equiv_pos_as_xyz
 'x, y, z'
 '-x+1/2, y+1/2, -z+1/2'
 '-x, -y, -z'
 'x-1/2, -y-1/2, z-1/2'
 
_cell_length_a                    10.9544(13)
_cell_length_b                    18.671(2)
_cell_length_c                    19.607(2)
_cell_angle_alpha                 90.00
_cell_angle_beta                  93.3410(10)
_cell_angle_gamma                 90.00
_cell_volume                      4003.3(8)
_cell_formula_units_Z             4
_cell_measurement_temperature     143(2)
_cell_measurement_reflns_used     ?
_cell_measurement_theta_min       ?
_cell_measurement_theta_max       ?
 
_exptl_crystal_description        'plate'
_exptl_crystal_colour             'brown'
_exptl_crystal_size_max           0.4
_exptl_crystal_size_mid           0.4
_exptl_crystal_size_min          0.1
_exptl_crystal_density_meas       ?
_exptl_crystal_density_diffrn     1.351
_exptl_crystal_density_method     'not measured'
_exptl_crystal_F_000              1728
_exptl_absorpt_coefficient_mu     1.143
_exptl_absorpt_correction_type    'multi-scan'
_exptl_absorpt_correction_T_min   0.657
_exptl_absorpt_correction_T_max   0.892
_exptl_absorpt_process_details    'SADABS, BRUKER 2001'
 
_exptl_special_details
;
 ?
;
 
_diffrn_ambient_temperature       143(2)
_diffrn_radiation_wavelength      0.71073
_diffrn_radiation_type            MoK\a
_diffrn_radiation_source          'fine-focus sealed tube'
_diffrn_radiation_monochromator   graphite
_diffrn_measurement_device_type   ?
_diffrn_measurement_method        ?
_diffrn_detector_area_resol_mean  ?
_diffrn_standards_number          ?
_diffrn_standards_interval_count  ?
_diffrn_standards_interval_time   ?
_diffrn_standards_decay_%         ?
_diffrn_reflns_number             44221
_diffrn_reflns_av_R_equivalents   0.0383
_diffrn_reflns_av_sigmaI/netI     0.0308
_diffrn_reflns_limit_h_min        -14
_diffrn_reflns_limit_h_max        14
_diffrn_reflns_limit_k_min        -24
_diffrn_reflns_limit_k_max        24
_diffrn_reflns_limit_l_min        -24
_diffrn_reflns_limit_l_max        25
_diffrn_reflns_theta_min          2.16
_diffrn_reflns_theta_max          27.50
_reflns_number_total              9067
_reflns_number_gt                 8132
_reflns_threshold_expression      >2sigma(I)
 
_computing_data_collection        ?
_computing_cell_refinement        ?
_computing_data_reduction         ?
_computing_structure_solution     ?
_computing_structure_refinement   'SHELXL-97 (Sheldrick, 1997)'
_computing_molecular_graphics     ?
_computing_publication_material   ?
 
_refine_special_details
;
 Refinement of F^2^ against ALL reflections.  The weighted R-factor wR and
 goodness of fit S are based on F^2^, conventional R-factors R are based
 on F, with F set to zero for negative F^2^. The threshold expression of
 F^2^ > 2sigma(F^2^) is used only for calculating R-factors(gt) etc. and is
 not relevant to the choice of reflections for refinement.  R-factors based
 on F^2^ are statistically about twice as large as those based on F, and R-
 factors based on ALL data will be even larger.
;
 
_refine_ls_structure_factor_coef  Fsqd
_refine_ls_matrix_type            full
_refine_ls_weighting_scheme       calc
_refine_ls_weighting_details
 'calc w=1/[\s^2^(Fo^2^)+(0.0429P)^2^+3.7682P] where P=(Fo^2^+2Fc^2^)/3'
_atom_sites_solution_primary      direct
_atom_sites_solution_secondary    difmap
_atom_sites_solution_hydrogens    geom
_refine_ls_hydrogen_treatment     constr
_refine_ls_extinction_method      none
_refine_ls_extinction_coef        ?
_refine_ls_number_reflns          9067
_refine_ls_number_parameters      415
_refine_ls_number_restraints      0
_refine_ls_R_factor_all           0.0550
_refine_ls_R_factor_gt            0.0485
_refine_ls_wR_factor_ref          0.1105
_refine_ls_wR_factor_gt           0.1075
_refine_ls_goodness_of_fit_ref    1.197
_refine_ls_restrained_S_all       1.197
_refine_ls_shift/su_max           0.001
_refine_ls_shift/su_mean          0.000
 
loop_
 _atom_site_label
 _atom_site_type_symbol
 _atom_site_fract_x
 _atom_site_fract_y
 _atom_site_fract_z
 _atom_site_U_iso_or_equiv
 _atom_site_adp_type
 _atom_site_occupancy
 _atom_site_symmetry_multiplicity
 _atom_site_calc_flag
 _atom_site_refinement_flags
 _atom_site_disorder_assembly
 _atom_site_disorder_group
C1 C 0.3075(2) 0.64703(15) 0.77792(13) 0.0220(5) Uani 1 1 d . . .
C2 C 0.2297(3) 0.68471(16) 0.81860(15) 0.0288(6) Uani 1 1 d . . .
C3 C 0.1634(3) 0.65256(19) 0.86804(15) 0.0342(7) Uani 1 1 d . . .
C4 C 0.1691(3) 0.5808(2) 0.88098(15) 0.0371(7) Uani 1 1 d . . .
H4 H 0.1239 0.5597 0.9157 0.045 Uiso 1 1 calc R . .
C5 C 0.2436(3) 0.53978(18) 0.84149(15) 0.0322(6) Uani 1 1 d . . .
H5 H 0.2489 0.4895 0.8485 0.039 Uiso 1 1 calc R . .
C6 C 0.3106(2) 0.57195(15) 0.79168(14) 0.0249(6) Uani 1 1 d . . .
C7 C 0.3936(2) 0.53286(14) 0.74819(14) 0.0232(5) Uani 1 1 d . . .
C8 C 0.4951(2) 0.57534(14) 0.72976(13) 0.0217(5) Uani 1 1 d . . .
C9 C 0.5752(2) 0.53929(15) 0.68978(15) 0.0258(6) Uani 1 1 d . . .
C10 C 0.5592(3) 0.46957(16) 0.66875(16) 0.0326(7) Uani 1 1 d . . .
C11 C 0.4618(3) 0.42925(16) 0.68762(17) 0.0359(7) Uani 1 1 d . . .
H11 H 0.4520 0.3809 0.6734 0.043 Uiso 1 1 calc R . .
C12 C 0.3782(3) 0.46175(15) 0.72828(16) 0.0302(6) Uani 1 1 d . . .
H12 H 0.3102 0.4353 0.7426 0.036 Uiso 1 1 calc R . .
C13 C 0.1174(3) 0.74195(16) 0.60403(16) 0.0318(6) Uani 1 1 d . . .
H13A H 0.1676 0.7711 0.5741 0.038 Uiso 1 1 calc R . .
H13B H 0.0421 0.7279 0.5769 0.038 Uiso 1 1 calc R . .
C14 C 0.0817(3) 0.7882(2) 0.66351(19) 0.0493(9) Uani 1 1 d . . .
H14A H 0.0366 0.8303 0.6460 0.074 Uiso 1 1 calc R . .
H14B H 0.1556 0.8037 0.6900 0.074 Uiso 1 1 calc R . .
H14C H 0.0300 0.7604 0.6929 0.074 Uiso 1 1 calc R . .
C15 C 0.2094(3) 0.61690(17) 0.54456(15) 0.0323(6) Uani 1 1 d . . .
H15A H 0.1287 0.6220 0.5196 0.039 Uiso 1 1 calc R . .
H15B H 0.2703 0.6422 0.5180 0.039 Uiso 1 1 calc R . .
C16 C 0.2428(3) 0.53770(18) 0.54871(19) 0.0454(8) Uani 1 1 d . . .
H16A H 0.2445 0.5179 0.5025 0.068 Uiso 1 1 calc R . .
H16B H 0.1817 0.5120 0.5740 0.068 Uiso 1 1 calc R . .
H16C H 0.3235 0.5322 0.5724 0.068 Uiso 1 1 calc R . .
C17 C 0.0880(3) 0.60525(17) 0.66849(15) 0.0315(6) Uani 1 1 d . . .
H17A H 0.1246 0.5578 0.6791 0.038 Uiso 1 1 calc R . .
H17B H 0.0700 0.6278 0.7125 0.038 Uiso 1 1 calc R . .
C18 C -0.0335(3) 0.59319(19) 0.62755(17) 0.0388(7) Uani 1 1 d . . .
H18A H -0.0869 0.5632 0.6541 0.058 Uiso 1 1 calc R . .
H18B H -0.0183 0.5692 0.5844 0.058 Uiso 1 1 calc R . .
H18C H -0.0732 0.6394 0.6180 0.058 Uiso 1 1 calc R . .
C19 C 0.5325(3) 0.63392(17) 0.55017(16) 0.0342(7) Uani 1 1 d . . .
H19A H 0.6125 0.6140 0.5668 0.041 Uiso 1 1 calc R . .
H19B H 0.4710 0.5957 0.5551 0.041 Uiso 1 1 calc R . .
C20 C 0.5392(4) 0.6483(2) 0.47540(19) 0.0564(10) Uani 1 1 d . . .
H20A H 0.5597 0.6040 0.4519 0.085 Uiso 1 1 calc R . .
H20B H 0.6023 0.6844 0.4685 0.085 Uiso 1 1 calc R . .
H20C H 0.4599 0.6661 0.4568 0.085 Uiso 1 1 calc R . .
C21 C 0.4338(3) 0.77763(15) 0.54950(14) 0.0279(6) Uani 1 1 d . . .
H21A H 0.4929 0.7854 0.5139 0.033 Uiso 1 1 calc R . .
H21B H 0.3568 0.7599 0.5265 0.033 Uiso 1 1 calc R . .
C22 C 0.4085(3) 0.84955(16) 0.58305(18) 0.0385(7) Uani 1 1 d . . .
H22A H 0.3764 0.8834 0.5482 0.058 Uiso 1 1 calc R . .
H22B H 0.4845 0.8685 0.6049 0.058 Uiso 1 1 calc R . .
H22C H 0.3482 0.8429 0.6176 0.058 Uiso 1 1 calc R . .
C23 C 0.6482(2) 0.74338(16) 0.63324(15) 0.0287(6) Uani 1 1 d . . .
H23A H 0.6373 0.7873 0.6605 0.034 Uiso 1 1 calc R . .
H23B H 0.6907 0.7080 0.6638 0.034 Uiso 1 1 calc R . .
C24 C 0.7328(3) 0.7617(2) 0.57681(19) 0.0429(8) Uani 1 1 d . . .
H24A H 0.8104 0.7801 0.5972 0.064 Uiso 1 1 calc R . .
H24B H 0.6942 0.7982 0.5468 0.064 Uiso 1 1 calc R . .
H24C H 0.7481 0.7186 0.5502 0.064 Uiso 1 1 calc R . .
C25 C 0.4595(3) 0.83987(15) 0.76556(16) 0.0341(7) Uani 1 1 d . . .
H25A H 0.4710 0.8223 0.7187 0.041 Uiso 1 1 calc R . .
H25B H 0.3702 0.8416 0.7709 0.041 Uiso 1 1 calc R . .
C26 C 0.5067(4) 0.91705(19) 0.7694(2) 0.0551(10) Uani 1 1 d . . .
H26A H 0.4631 0.9459 0.7340 0.083 Uiso 1 1 calc R . .
H26B H 0.5945 0.9176 0.7621 0.083 Uiso 1 1 calc R . .
H26C H 0.4928 0.9371 0.8145 0.083 Uiso 1 1 calc R . .
C27 C 0.4447(3) 0.78707(17) 0.90523(15) 0.0323(7) Uani 1 1 d . . .
H27A H 0.3711 0.7562 0.9039 0.039 Uiso 1 1 calc R . .
H27B H 0.4997 0.7703 0.9438 0.039 Uiso 1 1 calc R . .
C28 C 0.4049(3) 0.86270(19) 0.92147(17) 0.0439(8) Uani 1 1 d . . .
H28A H 0.3650 0.8628 0.9649 0.066 Uiso 1 1 calc R . .
H28B H 0.3474 0.8800 0.8850 0.066 Uiso 1 1 calc R . .
H28C H 0.4767 0.8941 0.9250 0.066 Uiso 1 1 calc R . .
C29 C 0.6758(3) 0.80631(18) 0.85230(17) 0.0364(7) Uani 1 1 d . . .
H29A H 0.6678 0.8573 0.8651 0.044 Uiso 1 1 calc R . .
H29B H 0.7067 0.7799 0.8936 0.044 Uiso 1 1 calc R . .
C30 C 0.7700(3) 0.8004(2) 0.79809(18) 0.0447(8) Uani 1 1 d . . .
H30A H 0.8483 0.8201 0.8162 0.067 Uiso 1 1 calc R . .
H30B H 0.7415 0.8274 0.7574 0.067 Uiso 1 1 calc R . .
H30C H 0.7807 0.7500 0.7860 0.067 Uiso 1 1 calc R . .
C31 C 0.6109(3) 0.6220(2) 0.95469(15) 0.0391(8) Uani 1 1 d . . .
H31A H 0.6674 0.5921 0.9838 0.047 Uiso 1 1 calc R . .
H31B H 0.6290 0.6728 0.9656 0.047 Uiso 1 1 calc R . .
C32 C 0.4803(3) 0.6057(2) 0.97188(18) 0.0461(8) Uani 1 1 d . . .
H32A H 0.4707 0.6154 1.0204 0.069 Uiso 1 1 calc R . .
H32B H 0.4622 0.5551 0.9622 0.069 Uiso 1 1 calc R . .
H32C H 0.4237 0.6359 0.9441 0.069 Uiso 1 1 calc R . .
C33 C 0.8048(3) 0.6248(2) 0.86713(17) 0.0432(8) Uani 1 1 d . . .
H33A H 0.8181 0.6763 0.8768 0.052 Uiso 1 1 calc R . .
H33B H 0.8463 0.5972 0.9049 0.052 Uiso 1 1 calc R . .
C34 C 0.8616(3) 0.6057(3) 0.80042(19) 0.0547(10) Uani 1 1 d . . .
H34A H 0.9492 0.6168 0.8042 0.082 Uiso 1 1 calc R . .
H34B H 0.8220 0.6336 0.7630 0.082 Uiso 1 1 calc R . .
H34C H 0.8503 0.5545 0.7911 0.082 Uiso 1 1 calc R . .
C35 C 0.6376(4) 0.50693(18) 0.86074(19) 0.0463(9) Uani 1 1 d . . .
H35A H 0.5553 0.4907 0.8722 0.056 Uiso 1 1 calc R . .
H35B H 0.6486 0.4926 0.8129 0.056 Uiso 1 1 calc R . .
C36 C 0.7320(4) 0.4662(2) 0.9066(2) 0.0635(12) Uani 1 1 d . . .
H36A H 0.7213 0.4146 0.8996 0.095 Uiso 1 1 calc R . .
H36B H 0.7206 0.4779 0.9546 0.095 Uiso 1 1 calc R . .
H36C H 0.8146 0.4801 0.8951 0.095 Uiso 1 1 calc R . .
F1 F 0.21296(16) 0.75659(10) 0.80938(9) 0.0377(4) Uani 1 1 d . . .
F2 F 0.08911(18) 0.69471(13) 0.90451(10) 0.0521(6) Uani 1 1 d . . .
F3 F 0.68076(14) 0.57222(9) 0.67236(9) 0.0325(4) Uani 1 1 d . . .
F4 F 0.64398(18) 0.44087(10) 0.62854(11) 0.0462(5) Uani 1 1 d . . .
P1 P 0.20354(6) 0.66013(4) 0.62898(4) 0.02267(15) Uani 1 1 d . . .
P2 P 0.49506(6) 0.70759(4) 0.60878(4) 0.02236(15) Uani 1 1 d . . .
P3 P 0.52342(7) 0.77151(4) 0.82537(4) 0.02610(16) Uani 1 1 d . . .
P4 P 0.63981(7) 0.60563(4) 0.86451(4) 0.02953(17) Uani 1 1 d . . .
Ni1 Ni 0.37745(3) 0.671723(17) 0.690903(17) 0.01903(9) Uani 1 1 d . . .
Ni2 Ni 0.51728(3) 0.660281(18) 0.787227(17) 0.02060(9) Uani 1 1 d . . .
 
loop_
 _atom_site_aniso_label
 _atom_site_aniso_U_11
 _atom_site_aniso_U_22
 _atom_site_aniso_U_33
 _atom_site_aniso_U_23
 _atom_site_aniso_U_13
 _atom_site_aniso_U_12
C1 0.0160(12) 0.0322(14) 0.0178(12) -0.0020(10) 0.0011(9) 0.0004(10)
C2 0.0229(14) 0.0370(16) 0.0260(14) -0.0073(12) -0.0032(11) 0.0030(11)
C3 0.0201(14) 0.061(2) 0.0217(14) -0.0103(14) 0.0058(11) 0.0005(13)
C4 0.0255(15) 0.062(2) 0.0247(15) 0.0027(14) 0.0082(12) -0.0083(14)
C5 0.0253(14) 0.0417(17) 0.0296(15) 0.0088(13) 0.0017(12) -0.0045(12)
C6 0.0197(13) 0.0338(15) 0.0209(13) 0.0020(11) 0.0002(10) -0.0006(11)
C7 0.0229(13) 0.0232(13) 0.0234(13) 0.0050(10) 0.0011(10) 0.0013(10)
C8 0.0210(13) 0.0205(12) 0.0237(13) 0.0022(10) 0.0021(10) 0.0031(10)
C9 0.0199(13) 0.0279(14) 0.0300(15) 0.0026(11) 0.0046(11) 0.0027(10)
C10 0.0351(16) 0.0276(14) 0.0361(16) 0.0003(12) 0.0108(13) 0.0121(12)
C11 0.0442(18) 0.0218(14) 0.0423(18) 0.0008(13) 0.0082(14) 0.0015(12)
C12 0.0292(15) 0.0249(14) 0.0370(16) 0.0037(12) 0.0056(12) -0.0044(11)
C13 0.0271(14) 0.0348(16) 0.0326(16) 0.0061(12) -0.0067(12) 0.0030(12)
C14 0.047(2) 0.049(2) 0.050(2) -0.0078(17) -0.0123(17) 0.0192(16)
C15 0.0329(16) 0.0403(17) 0.0236(14) -0.0031(12) 0.0008(12) -0.0086(13)
C16 0.053(2) 0.0363(18) 0.049(2) -0.0129(15) 0.0139(17) -0.0137(15)
C17 0.0220(14) 0.0446(17) 0.0275(15) 0.0068(13) -0.0012(11) -0.0073(12)
C18 0.0248(15) 0.050(2) 0.0413(18) 0.0049(15) -0.0015(13) -0.0107(13)
C19 0.0378(17) 0.0324(16) 0.0332(16) -0.0037(13) 0.0090(13) -0.0014(13)
C20 0.073(3) 0.059(2) 0.038(2) -0.0067(18) 0.0125(19) -0.005(2)
C21 0.0257(14) 0.0340(15) 0.0238(14) 0.0051(11) 0.0004(11) -0.0040(11)
C22 0.0429(18) 0.0287(15) 0.0424(19) 0.0085(13) -0.0098(15) 0.0023(13)
C23 0.0215(13) 0.0297(14) 0.0347(16) -0.0013(12) -0.0014(11) -0.0015(11)
C24 0.0267(16) 0.049(2) 0.053(2) 0.0037(16) 0.0040(15) -0.0113(14)
C25 0.0458(18) 0.0258(15) 0.0302(16) -0.0023(12) -0.0007(13) 0.0039(13)
C26 0.070(3) 0.0304(18) 0.064(3) 0.0026(17) -0.003(2) -0.0004(17)
C27 0.0328(16) 0.0402(17) 0.0237(14) -0.0075(12) -0.0002(12) 0.0044(13)
C28 0.050(2) 0.050(2) 0.0314(17) -0.0120(15) -0.0007(15) 0.0129(16)
C29 0.0324(16) 0.0399(17) 0.0366(17) -0.0115(14) -0.0021(13) -0.0096(13)
C30 0.0331(17) 0.057(2) 0.044(2) -0.0119(17) 0.0002(15) -0.0145(15)
C31 0.0322(16) 0.060(2) 0.0243(15) 0.0035(14) -0.0026(12) 0.0080(15)
C32 0.0417(19) 0.062(2) 0.0356(18) 0.0081(16) 0.0076(15) 0.0037(17)
C33 0.0201(15) 0.073(2) 0.0362(18) 0.0006(17) -0.0054(13) 0.0087(15)
C34 0.0278(17) 0.093(3) 0.044(2) -0.005(2) 0.0037(15) 0.0138(18)
C35 0.055(2) 0.0390(18) 0.044(2) 0.0098(15) -0.0048(17) 0.0152(16)
C36 0.063(3) 0.059(3) 0.068(3) 0.025(2) -0.005(2) 0.024(2)
F1 0.0342(10) 0.0403(10) 0.0388(10) -0.0104(8) 0.0033(8) 0.0108(8)
F2 0.0360(11) 0.0811(15) 0.0411(11) -0.0225(11) 0.0180(9) 0.0035(10)
F3 0.0212(8) 0.0359(9) 0.0416(10) 0.0013(8) 0.0122(7) 0.0033(7)
F4 0.0487(12) 0.0338(10) 0.0584(13) -0.0052(9) 0.0229(10) 0.0132(9)
P1 0.0201(3) 0.0275(3) 0.0203(3) 0.0020(3) 0.0000(3) -0.0023(3)
P2 0.0209(3) 0.0244(3) 0.0220(3) 0.0005(3) 0.0034(3) -0.0017(3)
P3 0.0246(4) 0.0274(4) 0.0259(4) -0.0044(3) -0.0019(3) -0.0001(3)
P4 0.0231(4) 0.0397(4) 0.0253(4) 0.0030(3) -0.0023(3) 0.0076(3)
Ni1 0.01670(16) 0.02197(17) 0.01851(17) 0.00078(12) 0.00178(12) 0.00055(12)
Ni2 0.01694(16) 0.02354(17) 0.02114(18) -0.00046(13) -0.00035(13) 0.00175(12)
 
_geom_special_details
;
 All esds (except the esd in the dihedral angle between two l.s. planes)
 are estimated using the full covariance matrix.  The cell esds are taken
 into account individually in the estimation of esds in distances, angles
 and torsion angles; correlations between esds in cell parameters are only
 used when they are defined by crystal symmetry.  An approximate (isotropic)
 treatment of cell esds is used for estimating esds involving l.s. planes.
;
 
loop_
 _geom_bond_atom_site_label_1
 _geom_bond_atom_site_label_2
 _geom_bond_distance
 _geom_bond_site_symmetry_2
 _geom_bond_publ_flag
C1 C2 1.392(4) . ?
C1 C6 1.427(4) . ?
C1 Ni1 1.965(3) . ?
C1 Ni2 2.308(3) . ?
C2 F1 1.365(3) . ?
C2 C3 1.382(4) . ?
C3 F2 1.365(3) . ?
C3 C4 1.365(5) . ?
C4 C5 1.388(4) . ?
C5 C6 1.391(4) . ?
C6 C7 1.475(4) . ?
C7 C12 1.391(4) . ?
C7 C8 1.430(4) . ?
C8 C9 1.384(4) . ?
C8 Ni2 1.952(3) . ?
C8 Ni1 2.317(3) . ?
C9 F3 1.371(3) . ?
C9 C10 1.374(4) . ?
C10 F4 1.363(3) . ?
C10 C11 1.374(4) . ?
C11 C12 1.388(4) . ?
C13 C14 1.520(5) . ?
C13 P1 1.847(3) . ?
C15 C16 1.524(5) . ?
C15 P1 1.846(3) . ?
C17 C18 1.531(4) . ?
C17 P1 1.835(3) . ?
C19 C20 1.496(5) . ?
C19 P2 1.853(3) . ?
C21 C22 1.528(4) . ?
C21 P2 1.849(3) . ?
C23 C24 1.523(4) . ?
C23 P2 1.843(3) . ?
C25 C26 1.531(4) . ?
C25 P3 1.844(3) . ?
C27 C28 1.517(4) . ?
C27 P3 1.854(3) . ?
C29 C30 1.528(5) . ?
C29 P3 1.840(3) . ?
C31 C32 1.520(5) . ?
C31 P4 1.840(3) . ?
C33 C34 1.523(5) . ?
C33 P4 1.840(3) . ?
C35 C36 1.533(5) . ?
C35 P4 1.844(4) . ?
P1 Ni1 2.2091(8) . ?
P2 Ni1 2.2232(8) . ?
P3 Ni2 2.2070(8) . ?
P4 Ni2 2.2140(8) . ?
Ni1 Ni2 2.3710(5) . ?
 
loop_
 _geom_angle_atom_site_label_1
 _geom_angle_atom_site_label_2
 _geom_angle_atom_site_label_3
 _geom_angle
 _geom_angle_site_symmetry_1
 _geom_angle_site_symmetry_3
 _geom_angle_publ_flag
C2 C1 C6 113.4(3) . . ?
C2 C1 Ni1 131.4(2) . . ?
C6 C1 Ni1 112.84(19) . . ?
C2 C1 Ni2 122.73(19) . . ?
C6 C1 Ni2 94.46(17) . . ?
Ni1 C1 Ni2 66.84(8) . . ?
F1 C2 C3 116.6(3) . . ?
F1 C2 C1 120.2(3) . . ?
C3 C2 C1 123.1(3) . . ?
F2 C3 C4 119.4(3) . . ?
F2 C3 C2 118.1(3) . . ?
C4 C3 C2 122.5(3) . . ?
C3 C4 C5 117.4(3) . . ?
C4 C5 C6 120.3(3) . . ?
C5 C6 C1 123.3(3) . . ?
C5 C6 C7 124.1(3) . . ?
C1 C6 C7 112.7(2) . . ?
C12 C7 C8 122.8(3) . . ?
C12 C7 C6 124.5(3) . . ?
C8 C7 C6 112.7(2) . . ?
C9 C8 C7 113.7(2) . . ?
C9 C8 Ni2 131.3(2) . . ?
C7 C8 Ni2 112.15(19) . . ?
C9 C8 Ni1 123.39(19) . . ?
C7 C8 Ni1 95.03(16) . . ?
Ni2 C8 Ni1 66.85(8) . . ?
F3 C9 C10 116.4(2) . . ?
F3 C9 C8 119.6(2) . . ?
C10 C9 C8 123.8(3) . . ?
F4 C10 C9 117.9(3) . . ?
F4 C10 C11 120.4(3) . . ?
C9 C10 C11 121.7(3) . . ?
C10 C11 C12 117.6(3) . . ?
C11 C12 C7 120.4(3) . . ?
C14 C13 P1 114.6(2) . . ?
C16 C15 P1 113.4(2) . . ?
C18 C17 P1 117.5(2) . . ?
C20 C19 P2 119.9(3) . . ?
C22 C21 P2 114.8(2) . . ?
C24 C23 P2 118.4(2) . . ?
C26 C25 P3 120.4(2) . . ?
C28 C27 P3 118.5(2) . . ?
C30 C29 P3 114.4(2) . . ?
C32 C31 P4 113.4(2) . . ?
C34 C33 P4 112.4(2) . . ?
C36 C35 P4 117.7(3) . . ?
C17 P1 C15 101.27(14) . . ?
C17 P1 C13 102.68(14) . . ?
C15 P1 C13 99.68(14) . . ?
C17 P1 Ni1 114.63(9) . . ?
C15 P1 Ni1 117.49(10) . . ?
C13 P1 Ni1 118.39(10) . . ?
C23 P2 C21 101.45(13) . . ?
C23 P2 C19 101.52(14) . . ?
C21 P2 C19 102.73(14) . . ?
C23 P2 Ni1 118.54(10) . . ?
C21 P2 Ni1 117.64(10) . . ?
C19 P2 Ni1 112.57(10) . . ?
C29 P3 C25 104.05(16) . . ?
C29 P3 C27 99.27(14) . . ?
C25 P3 C27 104.51(15) . . ?
C29 P3 Ni2 116.02(11) . . ?
C25 P3 Ni2 115.66(10) . . ?
C27 P3 Ni2 115.29(11) . . ?
C33 P4 C31 99.48(15) . . ?
C33 P4 C35 101.88(18) . . ?
C31 P4 C35 101.66(17) . . ?
C33 P4 Ni2 119.00(12) . . ?
C31 P4 Ni2 116.70(11) . . ?
C35 P4 Ni2 115.28(12) . . ?
C1 Ni1 P1 94.98(8) . . ?
C1 Ni1 P2 166.18(8) . . ?
P1 Ni1 P2 98.57(3) . . ?
C1 Ni1 C8 76.70(10) . . ?
P1 Ni1 C8 123.38(7) . . ?
P2 Ni1 C8 97.89(7) . . ?
C1 Ni1 Ni2 63.50(7) . . ?
P1 Ni1 Ni2 157.72(3) . . ?
P2 Ni1 Ni2 103.25(2) . . ?
C8 Ni1 Ni2 49.21(7) . . ?
C8 Ni2 P3 163.79(8) . . ?
C8 Ni2 P4 94.05(8) . . ?
P3 Ni2 P4 101.33(3) . . ?
C8 Ni2 C1 77.15(10) . . ?
P3 Ni2 C1 97.94(7) . . ?
P4 Ni2 C1 124.46(7) . . ?
C8 Ni2 Ni1 63.94(8) . . ?
P3 Ni2 Ni1 100.99(2) . . ?
P4 Ni2 Ni1 157.58(3) . . ?
C1 Ni2 Ni1 49.65(7) . . ?
 
_diffrn_measured_fraction_theta_max    0.986
_diffrn_reflns_theta_full              27.50
_diffrn_measured_fraction_theta_full   0.986
_refine_diff_density_max    0.786
_refine_diff_density_min   -0.407
_refine_diff_density_rms    0.082
